# Supplementary material for: Clinical Significance of Non-Coding RNA Regulation of Programmed Cell Death in Hepatocellular Carcinoma
Source: MDPI journal article supplement (doi:10.3390/cancers15164187), 2023-08-21
Supplement: s1 [file s1]

Table S1. ncRNAs and drug side effects.

| Drug          | ncRNAs                | Targets             | Effect                                     | Mechanism                                                                                                                                                                      | Refs.     |
|---------------|-----------------------|---------------------|--------------------------------------------|--------------------------------------------------------------------------------------------------------------------------------------------------------------------------------|-----------|
| Anthracycline | miR-200a-3p           | ↓ PEG3              | Pro-apoptosis<br>Promote<br>cardiotoxicity | MiR-200a-3p targets PEG3. Inhibition on miR-200a-3p leads to increased SIRT1 expression level while suppresses the NF-κB activity and reduces cell apoptosis.                  | [132]     |
|               | miR-215-5p            | ↓ ZEB2              | Pro-apoptosis<br>Promote<br>cardiotoxicity | MiR-215-5p can downregulate the expression of ZEB2, thereby inducing apoptosis in myocardial cells.                                                                            | [133]     |
|               | circRNA_0001312       | ↑ HMGB1             | Pro-apoptosis<br>Promote<br>cardiotoxicity | CircRNA_0001312 can sponge miR-409-3p, which targets HMGB1, thereby reducing DOX-induced myocardial cell apoptosis.                                                            | [134]     |
|               | miR-24-3p             | ↑ Nrf2              | Anti-apoptosis<br>Reduce<br>cardiotoxicity | MiR-24-3p can inhibit ROS induced cell apoptosis by activating Nrf2 pathway.                                                                                                   | [135,136] |
|               | miR-133b              | ↓ PTBP1<br>↓ TAGLN2 | Anti-apoptosis<br>Reduce<br>cardiotoxicity | MiR-133b can alleviate DOX-induced myocardial cell apoptosis and cardiac fibrosis by targeting PTBP1 and TAGLN2.                                                               | [137]     |
|               | miR-488-3p            | ↓ CyclinG1          | Anti-apoptosis<br>Reduce<br>cardiotoxicity | MiR-488-3p enhances the viability of cardiac cells and attenuates cardiomyocyte autophagic flux blockage and apoptosis by inhibiting Cyclin G1.                                | [138]     |
| Cisplatin     | lncRNA<br>XLOC_032768 | ↓ TNF-α             | Anti-apoptosis<br>Reduce<br>nephrotoxicity | XLOC_032768 reduces the expression of TNF-α induced by cisplatin and then improves cisplatin-induced apoptosis of renal tubular epithelial cells and kidney structural damage. | [146]     |
|               | miR-30a-5p            | ↓ MAPK8             | Anti-apoptosis<br>Reduce<br>nephrotoxicity | MiR-30a-5p can target and downregulate MAPK8 to protect HK-2 cells from                                                                                                        | [147]     |

|              |                 |         |                                            |                                                                                                                                                                                                                                   |       |
|--------------|-----------------|---------|--------------------------------------------|-----------------------------------------------------------------------------------------------------------------------------------------------------------------------------------------------------------------------------------|-------|
|              |                 |         |                                            | cisplatin-induced apoptosis.                                                                                                                                                                                                      |       |
|              | miR-455-5p      | ↓ PTEN  | Anti-apoptosis<br>Reduce ototoxicity       | MiR-455-5p suppresses PTEN levels and activates PI3K/AKT pathway. This reduces cisplatin-induced apoptosis and oxidative stress.                                                                                                  | [148] |
| Fluorouracil | lncRNA<br>NEAT1 | ↑ FOXO1 | Anti-apoptosis<br>Reduce<br>cardiotoxicity | NEAT1 acts as an anti-apoptotic molecule by competitively binding with miR-142-3p as a ceRNA. The NEAT1/miR-142-3p/FOXO1 axis is involved in the cardioprotective mechanism, offering protection against cardiomyocyte apoptosis. | [152] |

---

Abbreviations: AKT, protein kinase B; ceRNA, competing endogenous RNAs; circRNA, circular RNA; DOX, doxorubicin; FOXO1, forkhead box protein O1; HCC, hepatocellular carcinoma; HMGB1, high-mobility group box 1; lncRNA, long non-coding RNA; MAPK8, mitogen-activated protein kinase 8; ncRNA, non-coding RNA; NF-κB, Nuclear Factor Kappa B; Nrf2, nuclear factor erythroid 2-related factor 2; PEG3, paternally expressed gene 3; PI3K, phosphatidylinositol 3 kinase; PTBP1, polypyrimidine tract binding protein 1; ROS, reactive oxygen species; SIRT1, sirtuin 1; TAGLN2, transgelin 2; TNF-α, tumor necrosis factor-alpha; ZEB2, Zinc finger E-box-binding homeobox 2; ↑ , elevated expression level; ↓ , decreased expression level.
